# Supplementary material for: Antiviral Effect of hBD-3 and LL-37 during Human Primary Keratinocyte Infection with West Nile Virus
Source: MDPI journal article supplement (doi:10.3390/v14071552), 2022-07-15
Supplement: s1 [file s1]

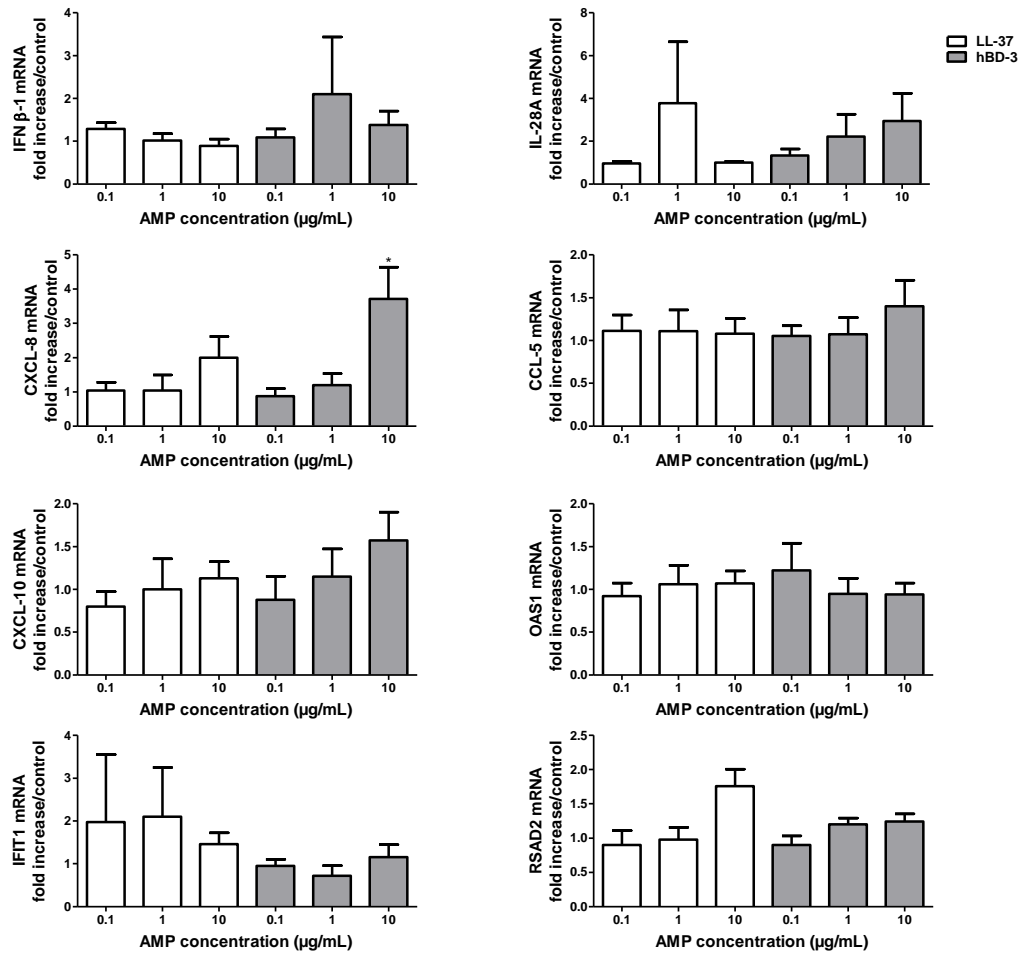

**Figure S1.** Inflammatory response of NHEK stimulated with increasing concentrations of LL-37 or hBD-3 for 3 h. Mean +/- SEM of 6 independent experiments are presented here. \* $p < 0.05$ .
